# Supplementary material for: AI-powered discovery of a novel p53-Y220C reactivator
Source: PubMed Central journal article supplement (PMC10430779; doi:10.3389/fonc.2023.1229696), 2023-08-01
Supplement: DataSheet_1.pdf [file DataSheet_1.pdf]

# Supplementary Table and Figures

## Supplemental Table 1

| No | Code | MW      | Systematic name                                                                                                                                           | SMILES                                                                        |
|----|------|---------|-----------------------------------------------------------------------------------------------------------------------------------------------------------|-------------------------------------------------------------------------------|
| 1  | A01  | 420.436 | 2-(1-methanesulfonyl-1,2,3,4-tetrahydroquinolin-6-yl)-2-oxoethyl 2-[[furan-2-yl]formamido]acetate                                                         | CS(N1C2=C(C=C(C(COC(CNC(C3OC=CC=3)=O)=O)=O)C=C2)CCC1)(=O)=O                   |
| 2  | A02  | 464.899 | 2-(6-amino-1,3-dimethyl-2,4-dioxo-1,2,3,4-tetrahydropyrimidin-5-yl)-2-oxoethyl                                                                            | CC[C@@H]([C@@H])(C(OCC(C1C(=O)N(C)C(=O)N(C)C=1N)=O)=O)NC(C1=CC=C(C1)C=C1)=O)C |
| 3  | A03  | 275.322 | carbamoyl(phenyl)methyl 5-methylthiophene-2-carboxylate                                                                                                   | CC1SC(C(OC(C2=CC=CC=C2)C(N)=O)=O)=CC=1                                        |
| 4  | A04  | 344.384 | 1-[2-(3-methyl-1-benzothiophen-2-yl)-2-oxoethyl]-3-(propan-2-yl)imidazolidine-2,4,5-trione                                                                | CC(N1C(=O)C(=O)N(CC(C2=C(C)C3=C(C=CC=C3)S2)=O)C1=O)C                          |
| 5  | A05  | 361.822 | propan-2-yl 3-(2-chlorophenyl)-3-[[pyridin-3-yl]carbamoyl]amino]propanoate                                                                                | CC(OC(CC(C1=C(C)C)=CC=C1)NC(NC1=CN=CC=C1)=O)=O)C                              |
| 6  | A06  | 347.405 | 4-benzyl 1-tert-butyl (2S)-2-(cyclopropylformamido)butanedioate                                                                                           | CC(OC([C@@H])(NC(C1CC1)=O)CC(OCC1=CC=CC=C1)=O)=O)(C)C                         |
| 7  | A07  | 475.539 | 2-[1-(1,5-dimethyl-3-oxo-2-phenyl-2,3-dihydro-1H-pyrazol-4-yl)-2,5-dimethyl-1H-pyrrol-3-yl]-2-oxoethyl 1,3,5-trimethyl-1H-pyrazole-4-carboxylate          | CC1N(C2C(=O)N(C3=CC=CC=C3)N(C)C=2)C(C)=C(C(COC(C2=C(C)N(C)N=C2C)=O)=O)C=1     |
| 8  | A08  | 330.338 | N-[carbamoyl(phenyl)methyl]-3-(6-methyl-2,4-dioxo-1,2,3,4-tetrahydropyrimidin-5-yl)propanamide                                                            | CC1=C(CCC(NC(C2=CC=CC=C2)C(N)=O)=O)C(=O)NC(=O)N1                              |
| 9  | A09  | 454.334 | benzyl 2-[(2-bromophenyl)formamido]-4-methanesulfonylbutanoate                                                                                            | CS(CCC(C(OC(C1=CC=CC=C1)=O)NC(C1=C(Br)C=CC=C1)=O)(=O)=O)O                     |
| 10 | A10  | 335.373 | N-((cyclobutyl(4-fluorophenyl)methyl)carbamoyl)methyl)-2-acetamidooacetamide                                                                              | CC(NCC(NC(C1=CC=C(F)C=C1)C1CCC1)=O)=O                                         |
| 11 | B01  | 471.516 | 3-(2-[[1-benzyl-5-(trifluoromethyl)-1H-1,3-benzodiazol-2-yl]sulfanyl]ethanesulfonyl)propanamide                                                           | NC(CCS(CCSC1N(CC2=CC=CC=C2)C2=C(C=C(C(F)F)F)C=C2)N=1)(=O)=O                   |
| 12 | B02  | 320.333 | N-[2-(3,5-dimethylphenyl)-2-hydroxyethyl]-2,2-difluoro-2-(pyridin-2-yl)acetamide                                                                          | CC1=CC(CNC(C2=NC=CC=C2)(F)F)=O)O)=CC(C)=C1                                    |
| 13 | B03  | 440.308 | methyl 2-{2-[(3-bromophenyl)methanesulfonyl]acetamido}-2-phenylacetate                                                                                    | COC(C(C1=CC=CC=C1)NC(CS(CC1=CC(Br)=CC=C1)=O)=O)=O)=O                          |
| 14 | B04  | 389.468 | methyl (2S)-3,3-dimethyl-2-((5-[(phenylcarbamoyl)amino]thiophen-2-yl)formamido)butanoate                                                                  | CC(C([C@@H])(C(C)(C)C)NC(C1SC(NC(NC2=CC=CC=C2)=O)=CC=1)=O)=O                  |
| 15 | B05  | 341.402 | methyl 2-(5-ethylthiophene-2-sulfonamido)-4-hydroxybenzoate                                                                                               | CCC1SC(S(NC2=C(C(OC)=O)C=CC(O)=C2)(=O)=O)=CC=1                                |
| 16 | B06  | 404.460 | 4-methoxy-3-nitro-N-[phenyl(thiophen-2-yl)methyl]benzene-1-sulfonamide                                                                                    | COC1=C(N(=O)=O)C=C(S(NC(C2=CC=CC=C2)C2SC=CC=2)(=O)=O)C=C1                     |
| 17 | B07  | 445.574 | ethyl 2-[2-(((2,3-dimethylphenyl)carbamoyl)methyl)(methyl)amino]acetamido]-5-(propan-2-yl)thiophene-3-carboxylate                                         | CCOC(C1=C(NC(CN(CC(NC2=C(C)C(C)=CC=C2)=O)C)=O)SC(C(C)C)=C1)=O                 |
| 18 | B08  | 329.347 | 2-[4-(1-acetamidoethyl)phenyl]-2-oxoethyl 2-methylfuran-3-carboxylate                                                                                     | CC(C1=CC=C(C(COC(C2=C(C)OC=C2)=O)=O)C=C1)NC(C)=O                              |
| 19 | B09  | 354.356 | methyl 2-(3-methyl-4-nitrobenzoyl)-1,2,3,4-tetrahydroisoquinoline-1-carboxylate                                                                           | COC(C1C2=C(C=CC=C2)CCN1C(C1=CC(C)=C(N(=O)O)C=C1)=O)=O                         |
| 20 | B10  | 338.382 | 2,3-dimethyl-N-[1-(1-methyl-1H-pyrazol-4-yl)ethyl]-6-nitrobenzene-1-sulfonamide                                                                           | CC(C1=CN(C)N=C1)NS(C1=C(N(=O)=O)C=CC(C)=C1C)(=O)=O                            |
| 21 | C01  | 349.404 | 2-(2-methyl-5-nitro-1H-imidazol-1-yl)ethyl 4H,5H,6H,7H,8H-cyclohepta[b]thiophene-2-carboxylate                                                            | CC1N(CCOCC(C2SC3=C(CCC3)C=2)=O)C(N(=O)=O)=CN=1                                |
| 22 | C02  | 355.344 | N-methyl-N-[1-(3-nitrophenyl)ethyl]-3-oxo-3,4-dihydro-2H-1,4-benzoxazine-7-carboxamide                                                                    | CC(C1=CC(N(=O)=O)=CC=C1)N(C(C1=CC2=C(NC(CO2)=O)C=C1)=O)C                      |
| 23 | C03  | 346.783 | 4-chloro-2-fluoro-N-(6-oxo-2-phenylpiperidin-3-yl)benzamide                                                                                               | FC1=C(C(NC2C(C3=CC=CC=C3)NC(=O)CC2)=O)C=CC(CI)=C1                             |
| 24 | C04  | 390.817 | 1-[4-(4-carbamoylphenoxy)benzoyl]pyrrolidine-3-carboxylic acid hydrochloride                                                                              | NC(C1=CC(OC2C=CC(C(N3CC(C(=O)O)CC3)=O)=CC=2)=CC=1)=O.Cl                       |
| 25 | C05  | 366.377 | N-(3-methyl-1-phenylbutyl)-2-[2-oxo-5-(trifluoromethyl)-1,2-dihydropyridin-1-yl]acetamide                                                                 | CC(CC(C1=CC=CC=C1)NC(CN1C(=O)C=CC(C(F)F)F)=C1)=O)C                            |
| 26 | C06  | 323.362 | N-(butan-2-yl)-2-[2-(3-fluorophenyl)acetamido]butanediamide                                                                                               | CCC(NC(C(NC(C1=CC(F)=CC=C1)=O)CC(N)=O)=O)C                                    |
| 27 | C07  | 341.405 | methyl 5-[[6-(dimethylamino)pyridin-3-yl]sulfamoyl]thiophene-2-carboxylate                                                                                | COC(C1SC(S(NC2=CN=C(N(C)C)C=C2)(=O)=O)=CC=1)=O                                |
| 28 | C08  | 387.903 | 2-(((5-chloro-2-methylphenyl)carbamoyl)methyl)(ethylamino)-N-(3-ethylphenyl)acetamide                                                                     | CCN(CC(NC1=C(C)C=CC(CI)=C1)=O)CC(NC1=CC(C)=CC=C1)=O                           |
| 29 | C09  | 398.861 | 2-(5-chlorothiophen-2-yl)-2-oxoethyl 2-(1-methyl-2,4-dioxo-1,3-diazaspiro[4.5]decan-3-yl)acetate                                                          | CN1C2(CCCCC2)C(=O)N(CC(OCC(C2SC(CI)=CC=2)=O)C1=O                              |
| 30 | C10  | 439.459 | 4-fluoro-N-[2-oxo-2-(3-oxo-1,2,3,4-tetrahydroquinoxalin-1-yl)ethyl]-N-phenylbenzene-1-sulfonamide                                                         | FC1=CC=C(S(NC2=CC=CC=C2)CC(N2C3=C(C=CC=C3)NC(=O)C2)=O)(=O)=O)C=C1             |
| 31 | D01  | 439.385 | 2-[ethyl[[6-nitro-2,4-dihydro-1,3-benzodioxin-8-yl)methyl]amino]-N-[2-(trifluoromethyl)phenyl]acetamide                                                   | CCN(CC1=C2C(COC2)=CC(N(=O)=O)=C1)CC(NC1=C(C(F)F)F)C=CC=C1)=O                  |
| 32 | D02  | 312.430 | 2-[(2S)-2-(dimethylamino)propanamido]-4-methyl-N-(1,3-thiazol-2-yl)pentanamide                                                                            | CC(CC(C(NC1SC=CN=1)=O)NC([C@@H])(N(C)C)C)=O)C                                 |
| 33 | D03  | 480.597 | (3-[(propan-2-yloxy)carbonyl]-4,5,6,7-tetrahydro-1-benzothiophen-2-yl)carbamoyl)methyl 7a-methyl-5-oxo-hexahydropyrrolo[2,1-b][1,3]thiazole-3-carboxylate | CC(OC(C1C2=C(C(CCC2)SC=1NC(COC(C1N2C(CCC2)=O)(C)SC1)=O)=O)O)C                 |
| 34 | D04  | 269.363 | 2-acetamido-N,3-dimethyl-N-(4-methyl-1,3-thiazol-2-yl)butanamide                                                                                          | CC(C(C(N(C1SC=C(C)N=1)C)=O)NC(C)=O)C                                          |
| 35 | D05  | 343.357 | 3-(1-phenyl-1H-pyrazole-4-sulfonamido)benzoic acid                                                                                                        | OC(C1=CC(NS(C2=CN(C3=CC=CC=C3)N=C2)(=O)=O)=CC=C1)=O                           |
| 36 | D06  | 390.272 | 5-bromo-4-[(3,5-dimethylphenyl)sulfamoyl]thiophene-2-carboxylic acid                                                                                      | CC1=CC(NS(C2=C(Br)SC(C(O)=O)=C2)(=O)=O)=CC(C)=C1                              |
| 37 | D07  | 346.357 | 1-(3-methyl-4-nitrobenzenesulfonyl)-1,2,3,4-tetrahydroquinolin-4-one                                                                                      | CC1=C(N(=O)=O)C=CC(S(N2C3=C(C=CC=C3)C(=O)CC2)(=O)=O)=C1                       |
| 38 | D08  | 412.432 | N,N-diethyl-4-[2-(4-fluorophenoxy)ethoxy]-3-nitrobenzene-1-sulfonamide                                                                                    | CCN(S(C1=CC(N(=O)=O)=C(OCCOC2=CC=C(F)C=C2)C=C1)(=O)=O)CC                      |
| 39 | D09  | 395.408 | N-[[2H-1,3-benzodioxol-5-yl)methyl]-2-[4-methyl-3-(4-methylphenyl)-2,5-dioximidazolidin-1-yl]acetamide                                                    | CC1C(=O)N(CC(NCC2=CC3=C(OC3)C=C2)=O)C(=O)N1C1=CC=C(C)C=C1                     |
| 40 | D10  | 327.786 | 4-chloro-N-(2-methanesulfonamido-5-methylphenyl)-1H-pyrrole-2-carboxamide                                                                                 | CC1=CC(NC(C2NC=C(CI)C=2)=O)=C(NS(C)=O)=O)C=C1                                 |
| 41 | E01  | 449.498 | [(1-methyl-1H-pyrrole-2-carbonyl)carbamoyl)methyl (2S)-3-methyl-2-[2-(naphthalen-1-yl)acetamido]butanoate                                                 | CC([C@@H])(C(OCC(NC(C1N(C)C=CC=1)=O)=O)NC(CC1=C2C(C=CC=C2)=CC=C1)=O)C         |
| 42 | E02  | 393.328 | N-(1-cyclopropylethyl)-2-(2,6-dichlorobenzenesulfonamido)-3-methylbutanamide                                                                              | CC(C(C(NC(C1CC1)C)=O)NS(C1=C(CI)C=CC=C1CI)(=O)=O)C                            |

|    |     |         |                                                                                                                                            |                                                                            |
|----|-----|---------|--------------------------------------------------------------------------------------------------------------------------------------------|----------------------------------------------------------------------------|
| 43 | E03 | 469.531 | 2-[(2-cyclopropyl-3-oxo-2,3-dihydro-1H-isindol-1-yl)formamido]-N-[[2-(phenoxy)methyl]phenyl]methyl]acetamide                               | O=C(NCC1=C(C(COC2=CC=CC=C2)C=CC=C1)CNC(C1C2=C(C=CC=C2)C(=O)N1C1CC1)=O      |
| 44 | E04 | 371.817 | 1-[2-(1-benzyl-2,5-dimethyl-1H-pyrrol-3-yl)-2-oxoethyl]-5-chloro-1,2,3,4-tetrahydropyrimidine-2,4-dione                                    | CC1N(CC2=CC=CC=C2)C(C)=C(C(CN2C(=O)NC(=O)C(CI)=C2)=O)C=1                   |
| 45 | E05 | 463.548 | 2-[3-(benzylsulfamoyl)-4-methylbenzoyl]-1,2,3,4-tetrahydroisoquinoline-3-carboxamide                                                       | CC1=C(S(NCC2=CC=CC=C2)(=O)=O)C=C(C(N2C(C(N)=O)CC3=C(C=CC=C3)C2)=O)C=C1     |
| 46 | E06 | 479.953 | 2-(5-chlorothiophen-2-yl)-2-oxoethyl 3-[(4-methoxyphenyl)(methyl)sulfamoyl]benzoate                                                        | COC1=CC=C(N(S(C2=CC(C(OCC(C3SC(CI)=CC=3)=O)=O)=CC=C2)(=O)=O)C)C=C1         |
| 47 | E07 | 457.279 | {[(3-chlorophenyl)methyl]carbamoylethyl}methyl 2-[(5-chloro-2-fluorophenyl)formamido]-3-hydroxybutanoate                                   | CC(C(C(OCC(NCC1=CC(CI)=CC=C1)=O)=O)NC(C1=C(F)C=CC(CI)=C1)=O)O              |
| 48 | E08 | 459.560 | N-methyl-N-[2-(2-methyl-4-oxo-2,3,4,5-tetrahydro-1H-1,5-benzodiazepin-1-yl)-2-oxoethyl]-4H,5H-naphtho[1,2-b]thiophene-2-carboxamide        | CC1N(C(CN(C(C2SC3=C(CCC4=C3C=CC=C4)C2)=O)C)=O)C2=C(C=CC=C2)NC(=O)C1        |
| 49 | E09 | 343.829 | N-[(5-chlorothiophen-2-yl)methyl]-2-[2,5-dioxo-4-(propan-2-yl)imidazolidin-1-yl]-N-methylacetamide                                         | CC(C1C(=O)N(CC(N(C2SC(CI)=CC=2)C)=O)C(=O)N1)C                              |
| 50 | E10 | 402.510 | N-[(3-{ethyl(methyl)amino}methyl)phenyl]methyl]-1,3-dimethyl-2-oxo-2,3-dihydro-1H-1,3-benzodiazole-5-sulfonamide                           | CCN(CC1=CC(CNS(C2=CC3=C(N(C(N3C)=O)C)C=C2)(=O)=O)=CC=C1)C                  |
| 51 | F01 | 346.404 | 1-acetyl-N,2-dimethyl-N-(pyrazin-2-yl)-2,3-dihydro-1H-indole-5-sulfonamide                                                                 | CC1N(C(C)=O)C2=C(C=C(S(N(C3=NC=CN=C3)C)(=O)=O)C=C2)C1                      |
| 52 | F02 | 357.832 | 1-[[[4-chlorophenyl)methyl]sulfanyl]-4-methanesulfonyl-2-nitrobenzene                                                                      | CS(C1=CC(N(=O)=O)=C(SCC2=CC=C(CI)C=C2)C=C1)(=O)=O                          |
| 53 | F03 | 435.828 | 2-(butan-2-yl){[2-(1H-1,2,4-triazol-1-yl)-5-(trifluoromethyl)phenyl]carbamoylethyl}methyl]amino]acetic acid hydrochloride                  | Cl.CCC(N(CC(NC1C=C(C(F)(F)F)C=CC=1)N1N=CN=C1)=O)CC(=O)O)C                  |
| 54 | F04 | 381.492 | 5-(2-methyl-1,3-thiazol-4-yl)-N-[2-(2-oxo-1,2-dihydropyridin-1-yl)ethyl]thiophene-2-sulfonamide                                            | CC1SC=C(C2SC(S(NCCN3C(=O)C=CC=C3)(=O)=O)=CC=2)N=1                          |
| 55 | F05 | 390.840 | 2-oxo-2-oxolan-3-yl 1-[(2-chlorophenyl)methyl]-3-methyl-1H-thieno[2,3-c]pyrazole-5-carboxylate                                             | CC1C2=C(SC(C(OC3C(=O)OCC3)=O)=C2)N(CC2=C(CI)C=CC=C2)N=1                    |
| 56 | F06 | 331.333 | 1-[2-[benzyl(propan-2-yl)amino]acetyl]-3-(2,2,2-trifluoroethyl)urea                                                                        | CC(N(CC1=CC=CC=C1)CC(NC(NCC(F)(F)F)=O)=O)C                                 |
| 57 | F07 | 374.435 | N-[(4R,5S)-1,3-dimethyl-4-(4-methylphenyl)-6-oxo-1H,4H,5H,6H,7H-pyrazolo[3,4-b]pyridin-5-yl]benzamide                                      | CC1C2=C(NC(C[C@H]1[C@H]2C2=CC=C(C)C=C2)NC(C2=CC=CC=C2)=O)N(C)N=1           |
| 58 | F08 | 441.433 | 2-(6-acetyl-2H-1,3-benzodioxol-5-yl)-2-[3-[2-(cyclohex-1-en-1-yl)ethyl]-2,4,5-trioximidazolidin-1-yl]acetamide                             | CC(C1=C(NC(NC2C(=O)C(=O)N(CCC3CCCC=3)C2)=O)C=C2C(OCO2)=C1)O                |
| 59 | F09 | 318.390 | 2-(2,5-dimethylbenzenesulfonamido)-2-phenylacetamide                                                                                       | CC1=CC(S(NC(C2=CC=CC=C2)C(N)=O)(=O)=O)C(C)C=C1                             |
| 60 | F10 | 405.464 | methyl 2-[4-(2,5-dimethylthiophen-3-yl)-4-oxobutanamido]-2-(3-hydroxy-4-methoxyphenyl)acetate                                              | COC(C(C1=CC(O)=C(O)C)C=C1)NC(CCC(C1=C(C)SC(C)=C1)=O)=O)=O                  |
| 61 | G01 | 379.205 | 3-(3-bromophenyl)-3-[(6-methyl-2-oxo-1,2-dihydropyridin-3-yl)formamido]propanoic acid                                                      | CC1NC(=O)C(C(NC(C2C=CC=C(Br)C=2)CC(=O)O)=O)=CC=1                           |
| 62 | G02 | 341.856 | N-[2-(2-chlorophenyl)-2-(dimethylamino)ethyl]-2-(4-oxo-1,3-thiazolidin-3-yl)acetamide                                                      | CN(C(C1=C(CI)C=CC=C1)CNC(CN1C(=O)CSC1)=O)C                                 |
| 63 | G03 | 348.319 | (2S)-1-[2-[4-(trifluoromethyl)phenyl]acetyl]-2,3-dihydro-1H-indole-2-carboxamide                                                           | NC([C@H]1N(C(C2=CC=C(C(F)(F)F)C=C2)=O)C2=C(C=CC=C2)C1)=O                   |
| 64 | G04 | 387.452 | N-(3-methyl-1-phenylbutyl)-2,4-dioxo-1,2,3,4-tetrahydroquinazoline-6-sulfonamide                                                           | CC(CC(C1=CC=CC=C1)NS(C1=CC2=C(NC(NC2=O)=O)C=C1)(=O)=O)C                    |
| 65 | G05 | 442.461 | [(2H-1,3-benzodioxol-5-yl)carbamoylethyl]methyl 2-(1,3-dioxo-2,3,3a,4,7,7a-hexahydro-1H-isindol-2-yl)-4-methylpentanoate                   | CC(CC(C(OCC(NC1=CC2=C(OCO2)C=C1)=O)=O)N1C(=O)C2C(CC=CC2)C1=O)C             |
| 66 | G06 | 278.350 | N-(4-cyanophenyl)-5-methylthiophene-2-sulfonamide                                                                                          | CC1SC(S(NC2=CC=C(C#N)C=C2)(=O)=O)=CC=1                                     |
| 67 | G07 | 477.593 | 2-[1-(1,1-dioxo-1lambda6-thiolan-3-yl)-2,5-dimethyl-1H-pyrrol-3-yl]-2-oxoethyl 4-[4-(methylsulfanyl)phenyl]-4-oxobutanoate                 | CSC1=CC=C(C(CCC(OCC(C2=C(C)N(C3CS(=O)(=O)CC3)C(C)=C2)=O)=O)C)C=C1          |
| 68 | G08 | 491.562 | 4-[2-[5-(3,4-dimethoxyphenyl)-3-(thiophen-2-yl)-4,5-dihydro-1H-pyrazol-1-yl]-2-oxoethyl]-2,5-dimethyl-4H,7H-pyrazolo[1,5-a]pyrimidin-7-one | COC1=C(C(OC)C=C(C2N(C(CN3C4N(N=C(C=4)C)C)=O)C=C3C)=O)N=C(C3SC=CC=3)C2)C=C1 |
| 69 | G09 | 341.285 | 2-(2,4-dioxo-1,2,3,4-tetrahydropyrimidin-1-yl)-N-methyl-N-[[3-(trifluoromethyl)phenyl]methyl]acetamide                                     | CN(C(CN1C(=O)NC(=O)C=C1)=O)CC1=CC(C(F)(F)F)=CC=C1                          |
| 70 | G10 | 367.420 | N,1,3-trimethyl-N-[[5-(2-methylcyclopropyl)furan-2-yl]methyl]-2,4-dioxo-1,2,3,4-tetrahydropyrimidine-5-sulfonamide                         | CC1C(C2OC(CN(S(C3C(=O)N(C)C(=O)N(C)C3)=O)=O)C)=CC=2)C1                     |
| 71 | H01 | 425.861 | N-(2-chlorophenyl)-2-(N-methyl-7-fluoro-2-oxo-1,2,3,4-tetrahydroquinoline-6-sulfonamido)acetamide                                          | CN(S(C1=C(F)C=C2C(CCC(N2)=O)=C1)(=O)=O)CC(NC1=C(CI)C=C(C=C1)=O             |
| 72 | H02 | 353.457 | 2-[methyl{[(4-methylphenyl)carbamoylethyl]methyl}amino]-N-[1-(2-methylphenyl)ethyl]acetamide                                               | CC(C1=C(C)C=CC=C1)NC(CN(CC(NC1=CC=C(C)C=C1)=O)C)=O                         |
| 73 | H03 | 350.434 | N-(4-methylphenyl)-2-[5-[(3-methylphenyl)methylidene]-4-oxo-1,3-thiazolidin-2-ylidene]acetamide                                            | CC1=CC=C(NC(C=C2SC(CCC3=CC(C)=CC=C3)C(=O)N2)=O)C=C1                        |
| 74 | H04 | 324.352 | methyl 4-[N-[(3-methyl-1,2-oxazol-5-yl)methyl]methanesulfonamido]benzoate                                                                  | COC(C1=CC=C(N(S(C)=O)=O)CC2ON=C(C)C=C2)C=C1=O                              |
| 75 | H05 | 329.368 | 2-[2-[(4-fluoro-3-methylphenyl)amino]acetamido]-N-methyl-2-phenylacetamide                                                                 | CNC(C(C1=CC=CC=C1)NC(CNC1=CC(C)=C(F)C=C1)=O)O                              |
| 76 | H06 | 332.781 | 4-[3-(benzyloxy)propanamido]-2-chlorobenzamide                                                                                             | NC(C1=C(CI)C=C(NC(CCOCC2=CC=CC=C2)=O)C=C1)O                                |
| 77 | H07 | 412.458 | 2-[5-(2-acetamidoethyl)thiophen-2-yl]-2-oxoethyl 5-methyl-3-phenyl-1,2-oxazole-4-carboxylate                                               | CC(NCCC1SC(C(COC(C2C(C3=CC=CC=C3)=NOC=2)C)=O)=O)=CC=1)O                    |
| 78 | H08 | 330.358 | methyl 3-[(2-cyanophenyl)methanesulfonamido]benzoate                                                                                       | COC(C1=CC(NS(CC2=C(C#N)C=CC=C2)(=O)=O)=CC=C1)=O                            |
| 79 | H09 | 466.572 | 6-[6,7-dimethoxy-1-(thiophen-2-yl)-1,2,3,4-tetrahydroisoquinoline-2-carbonyl]-3,4-dihydro-2H-1,4-benzothiazin-3-one                        | COC1=C(OC)C=C2C(CCN(C(C3=CC4=C(SCC(N4)=O)C=C3)=O)C2C2SC=CC=2)C1            |
| 80 | H10 | 417.766 | N-[4-chloro-2-(trifluoromethyl)phenyl]-2-(3-cyclopentyl-2,4,5-trioximidazolidin-1-yl)acetamide                                             | FC(C1=C(NC(CN2C(=O)C(=O)N(C3CCCC3)C2)=O)C)=CC(CI)=C1(F)F                   |
| 81 | I01 | 329.345 | N-[2-(difluoromethyl)-1H-1,3-benzodiazol-5-yl]thiophene-2-sulfonamide                                                                      | FC(C1NC2=C(C=C(C=C2)NS(C2SC=CC=2)(=O)=O)N=1)F                              |
| 82 | I02 | 308.377 | 2-[2-methyl-4-(4-methylphenyl)-3,4-dihydroquinazolin-3-yl]acetohydrazide                                                                   | CC1N(CC(NN)=O)C(C2=CC=C(C)C=C2)C2=C(C=CC=C2)N=1                            |
| 83 | I03 | 447.289 | 4-[4-[(2,4-dichlorophenyl)methoxy]-3-nitrobenzenesulfonyl]morpholine                                                                       | O=N(C1=C(C(OCC2=C(CI)C=C(CI)C=C2)C=CC(S(N2CCOCC2)(=O)=O)=C1)=O             |

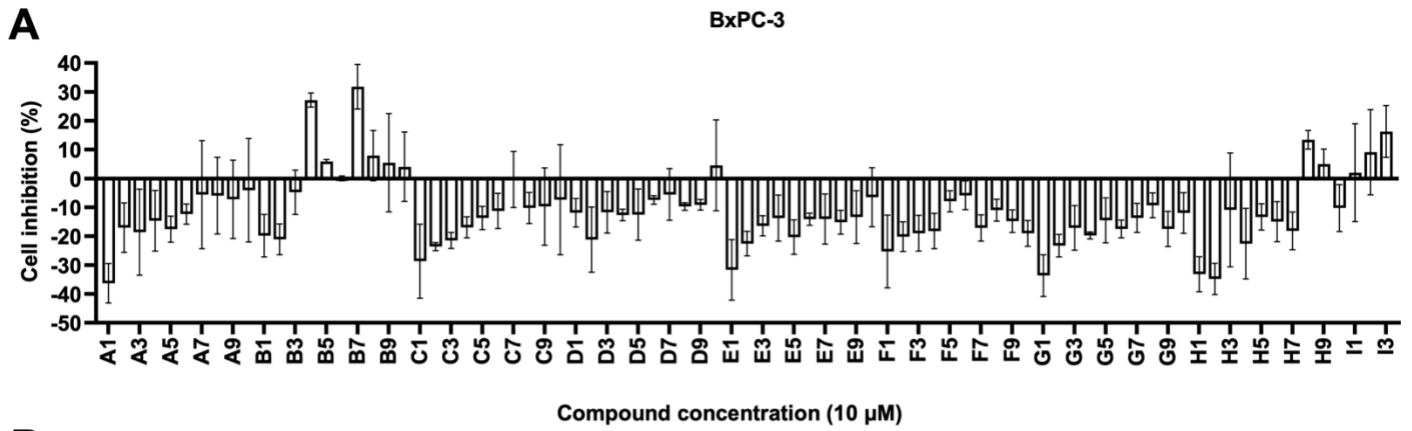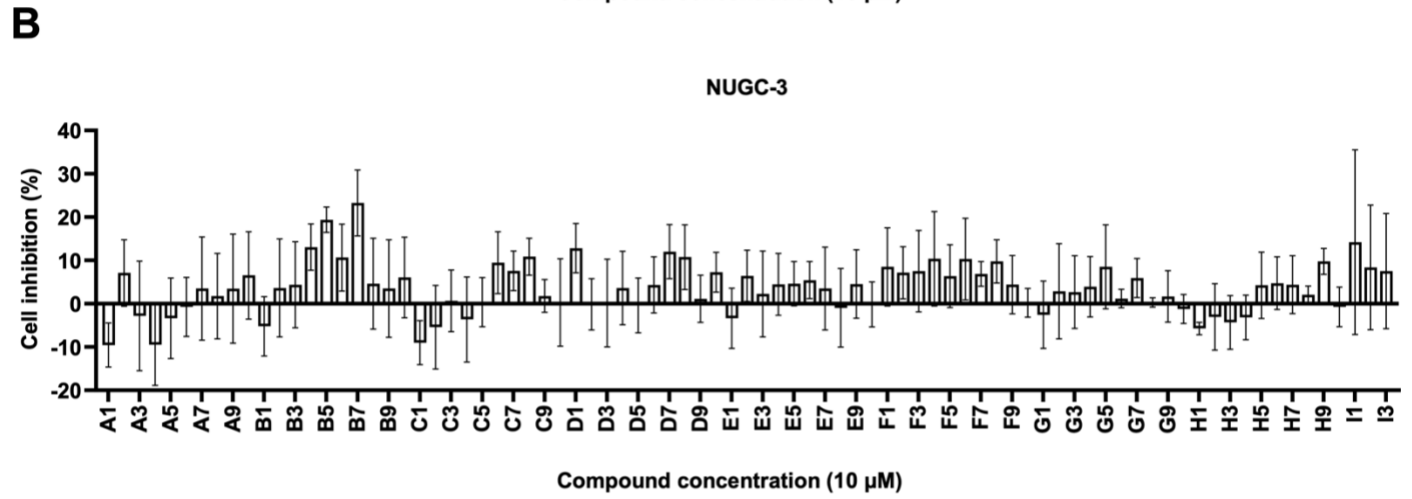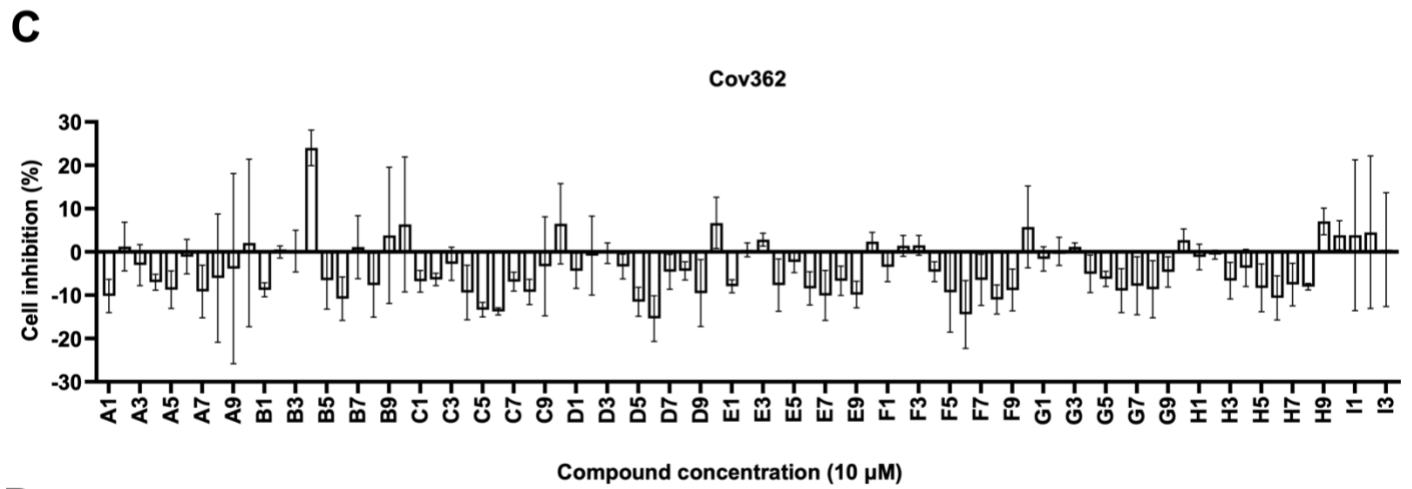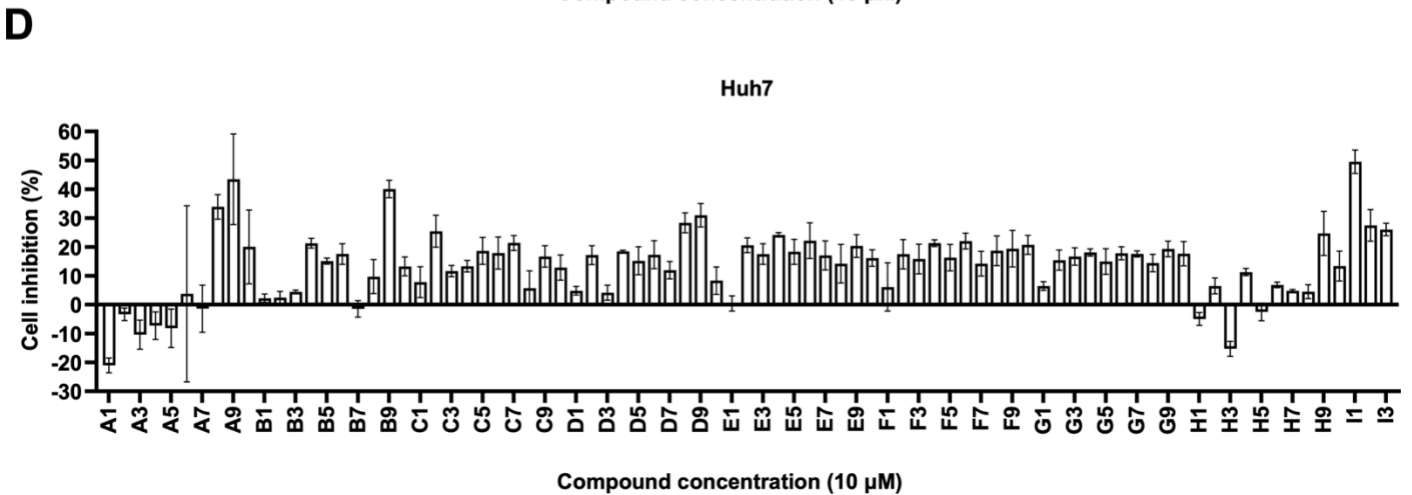

**Figure S1 Compound screening.** Cell viability, normalized to DMSO controls, of BxPC-3 (A), NUGC-3 (B), Cov362 (C), and Huh7 (D) cells treated for 72 h with indicated compounds. Error bars in (A-D) represent the means  $\pm$  SD.

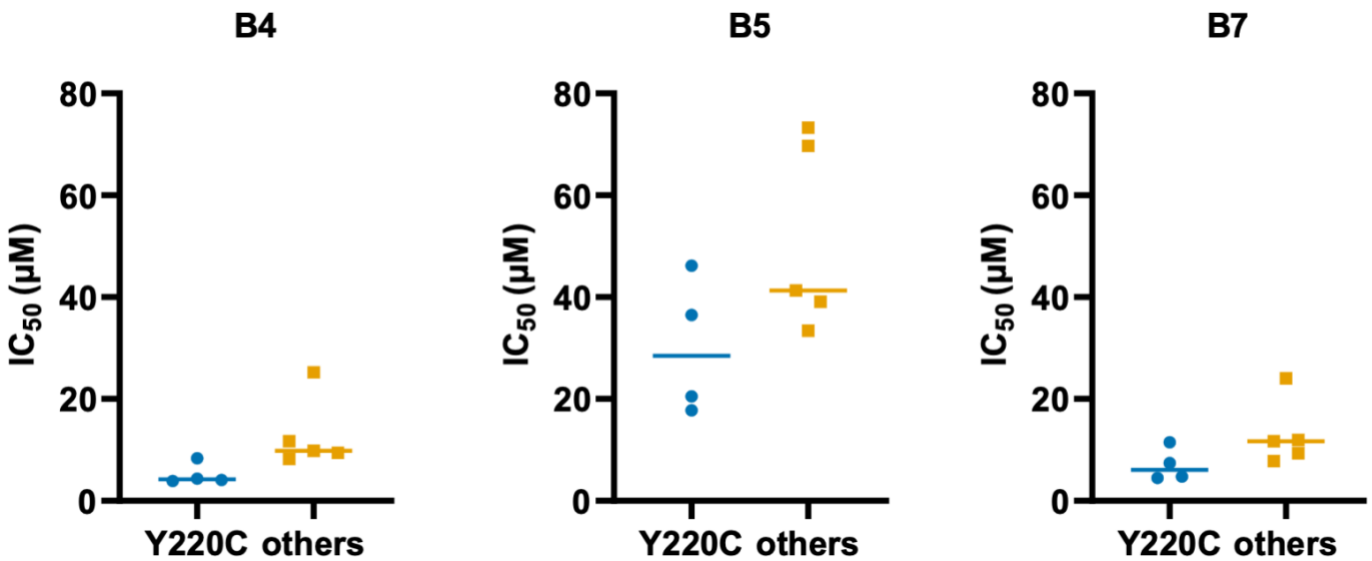

**Figure S2 Y220C specificity of compounds in inhibiting cell proliferation.** The dots represent the calculated IC<sub>50</sub> in cell lines with *p53-Y220C* mutation or other mutations.

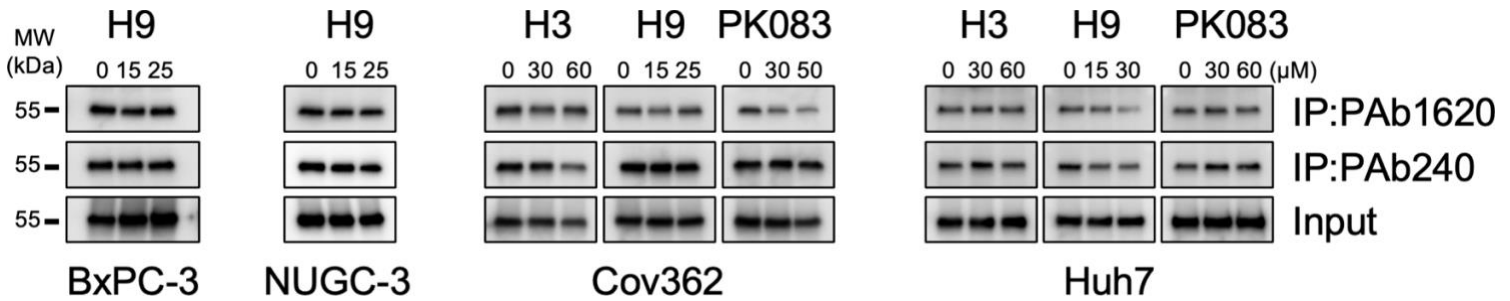

**Figure S3 Structural conversion induced by H3 and H9.** PA1620 and PAb240 IP for cells expressing endogenous *p53-Y220C* mutant treated with H3, H9, and PK083 for 24 h. Immunoblotting was performed using the anti-p53 DO-1 antibody after IP.

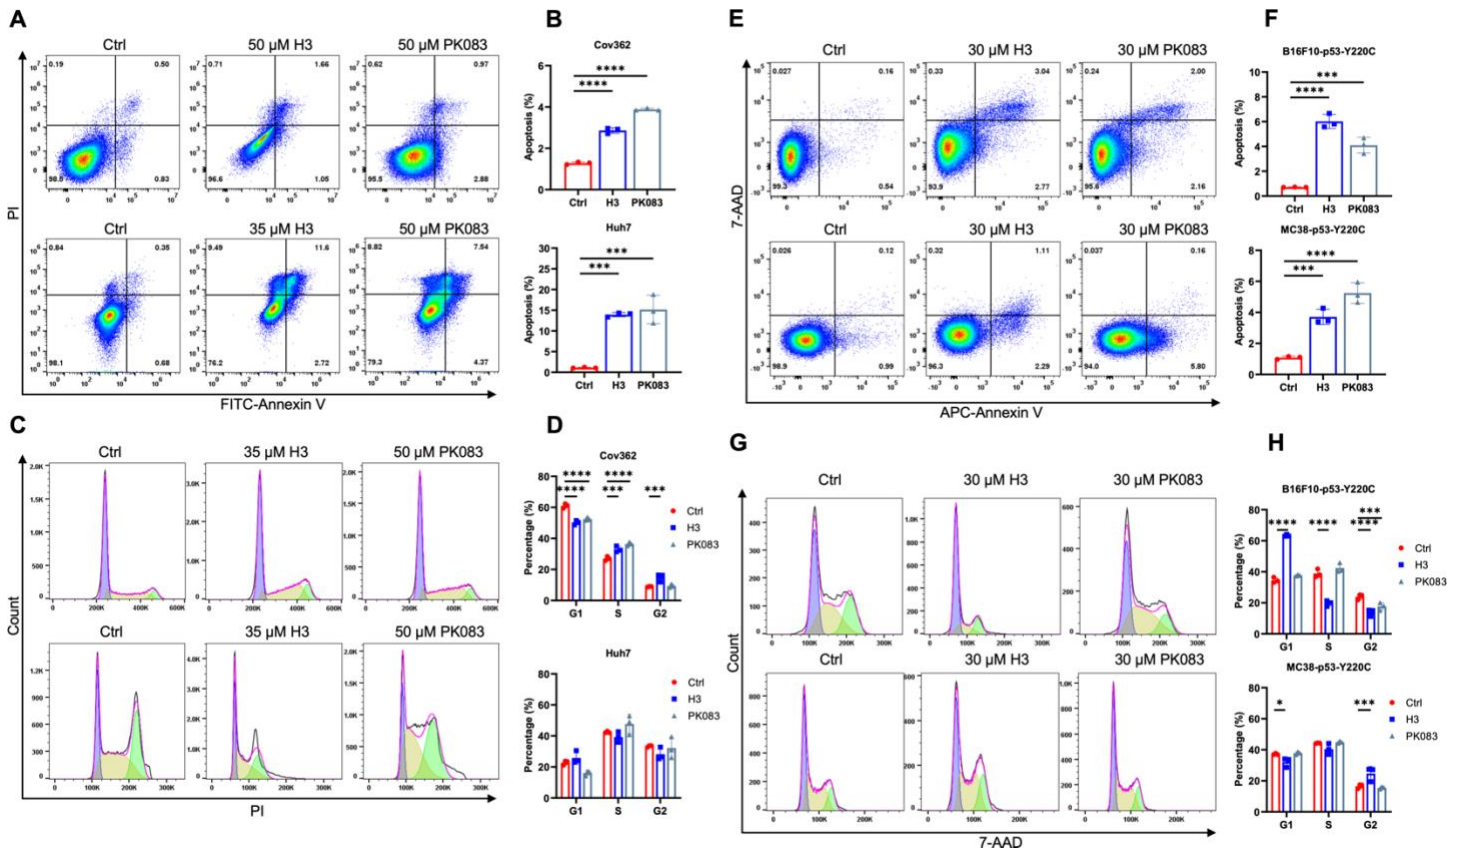

**Figure S4 H3 induces cycle arrest and apoptosis in p53-Y220C mutant cells.** (A) Flow cytometric plots of Annexin V vs. PI staining in Cov362 cells after treatment with 50  $\mu$ M H3 or PK083 for 48 h, and Huh7 cells after treatment with 35  $\mu$ M H3 or 50  $\mu$ M PK083 for 24 h. (B) From the histograms, the proportion of cell apoptosis were statistically analyzed. *p* values were calculated by one-way ANOVA followed by Dunnett's multiple-comparison test. (C) Cell cycle analysis by flow cytometry after PI staining of Cov362 cells treated with 35  $\mu$ M H3 or 50  $\mu$ M PK083 for 24 h or Huh7 cells treated with 35  $\mu$ M H3 or 50  $\mu$ M PK083 for 24 h. (D) From the histograms, the proportion of cell apoptosis and cell cycle distribution were statistically analyzed. *p* values were calculated by two-way ANOVA followed by Dunnett's multiple-comparison test. (E) Flow cytometric plots of Annexin V vs. 7-AAD staining in B16F10-p53-Y220C and MC38-p53-Y220C cells after treatment with 30  $\mu$ M H3 or 30  $\mu$ M PK083 for 24 h. (F) From the histograms, the proportion of cell apoptosis were statistically analyzed. *p* values were calculated by one-way ANOVA followed by Dunnett's multiple-comparison test. (G) Cell cycle analysis through 7-AAD staining and following flow cytometry. B16F10-p53-Y220C and MC38-p53-Y220C cells after treatment with 30  $\mu$ M H3 or 30  $\mu$ M PK083 for 24 h. (H) From the histograms, the proportion of cell cycle distribution were statistically analyzed. *p* values were calculated by

two-way ANOVA followed by Dunnett's multiple-comparison test.  $*p < 0.05$ ,  $**p < 0.01$ ,  $***p < 0.001$ , and  $****p < 0.0001$ . Error Bars in (B, D, F and H) represent mean  $\pm$  SD.

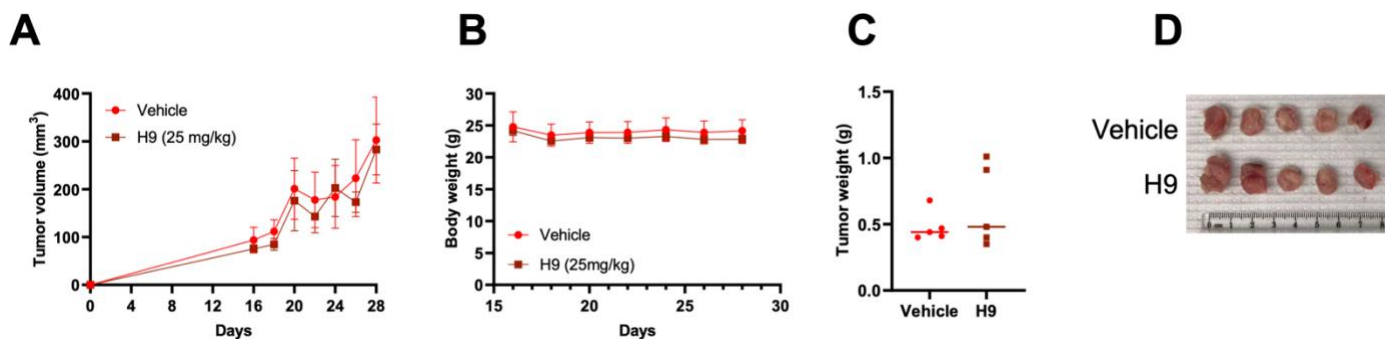

**Figure S5 H9 administration on NSG mice.** (A) Immunodeficient NSG mice were injected with NUGC-3 cells on day 0. Sixteen days post-inoculation, ten mice were randomly divided into two groups, then mice were treated with 25 mg/kg H9 every other day until the first control mouse reached humane endpoints. Tumor size was measured every other day. (B) Body weight of mice carrying the NUGC-3 tumors after treatments. (C) Tumors were weighed at the end of the experiment. (D) Images of the tumors excised from the mice on day 28 in the various treatment groups. Error Bars in (A) and (B) represent mean  $\pm$  SD.  $p$  values were calculated by a two-tailed  $t$ -test.
